# Supplementary material
Source: PubMed Central journal article supplement (PMC6804336)

# Supplementary Figures

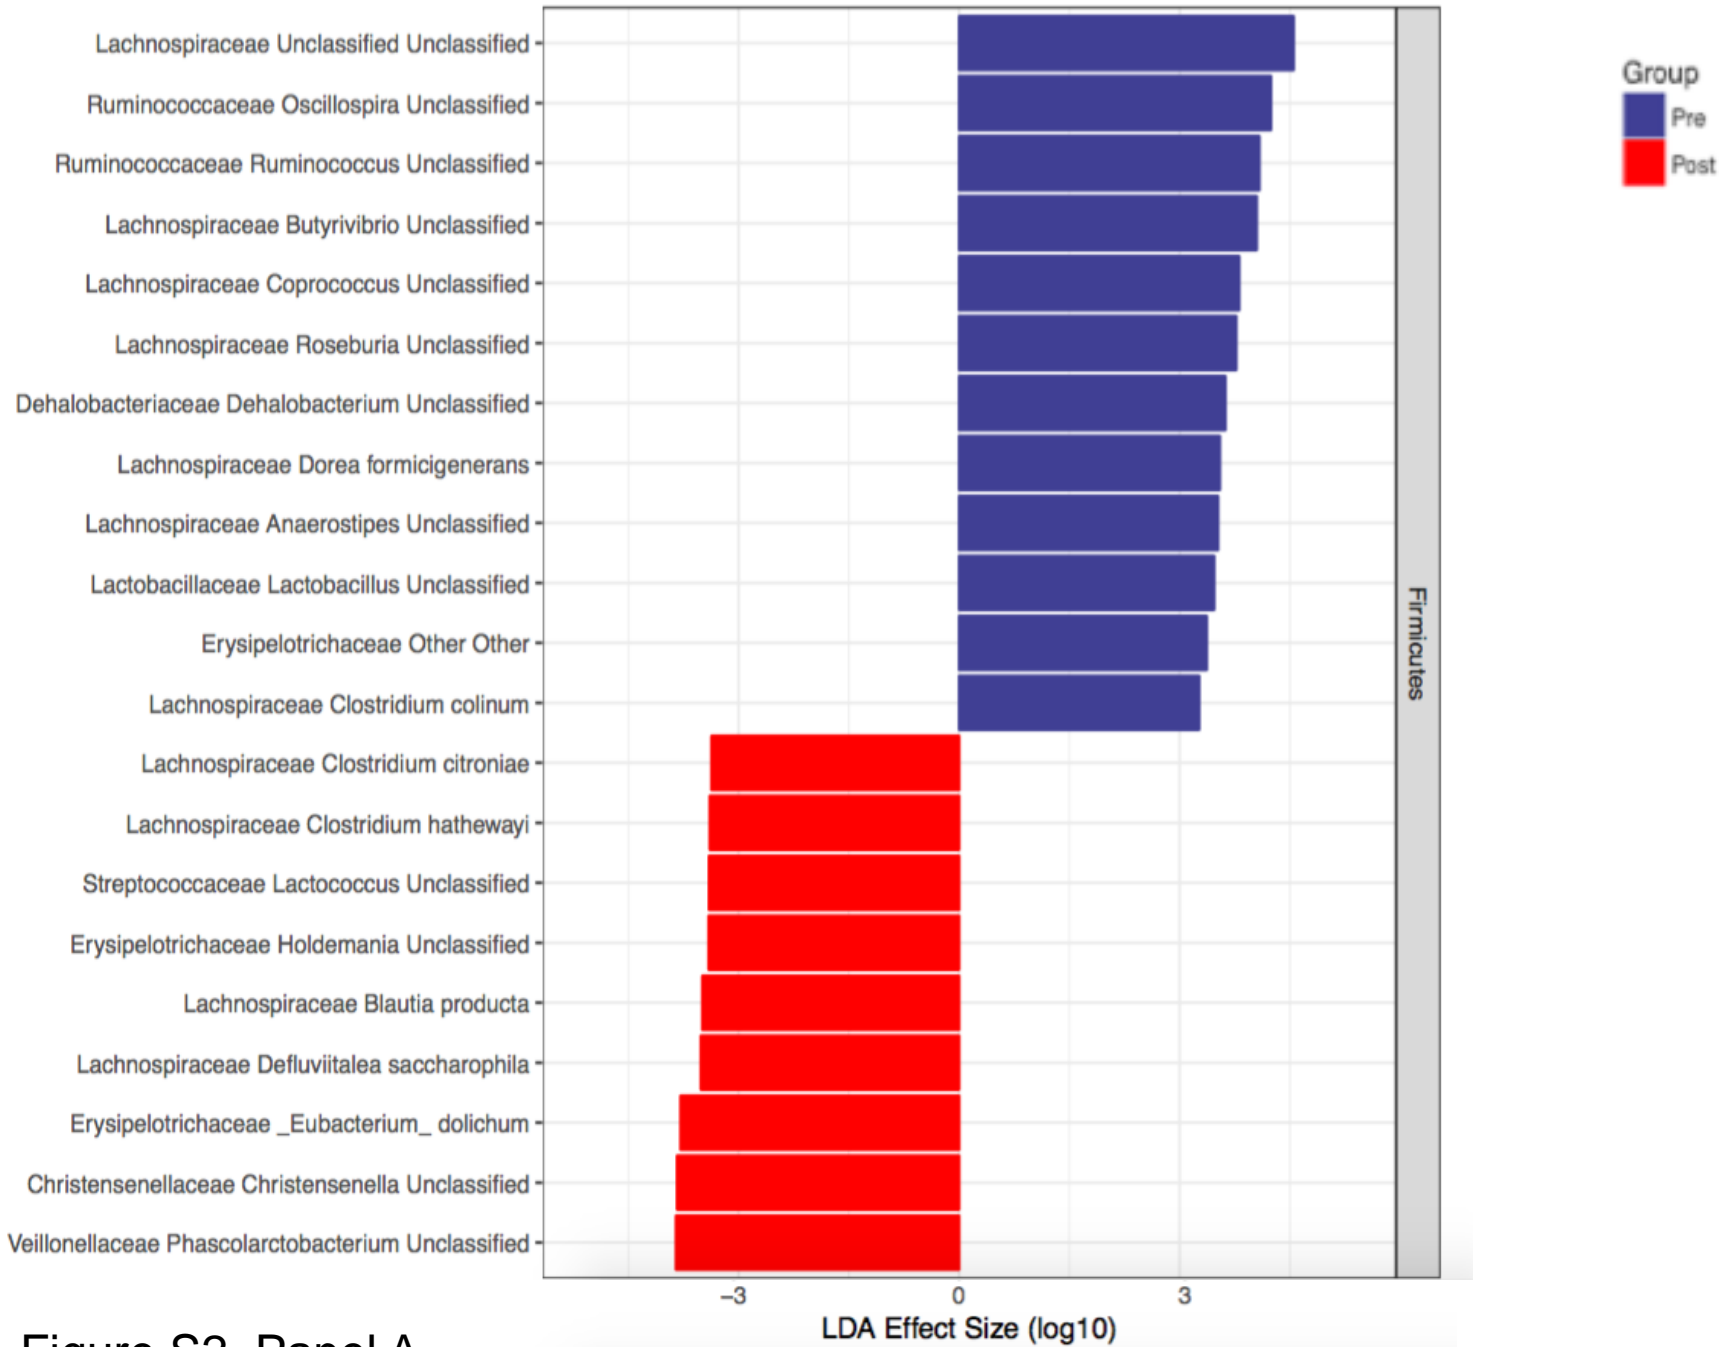

Figure S2, Panel A.

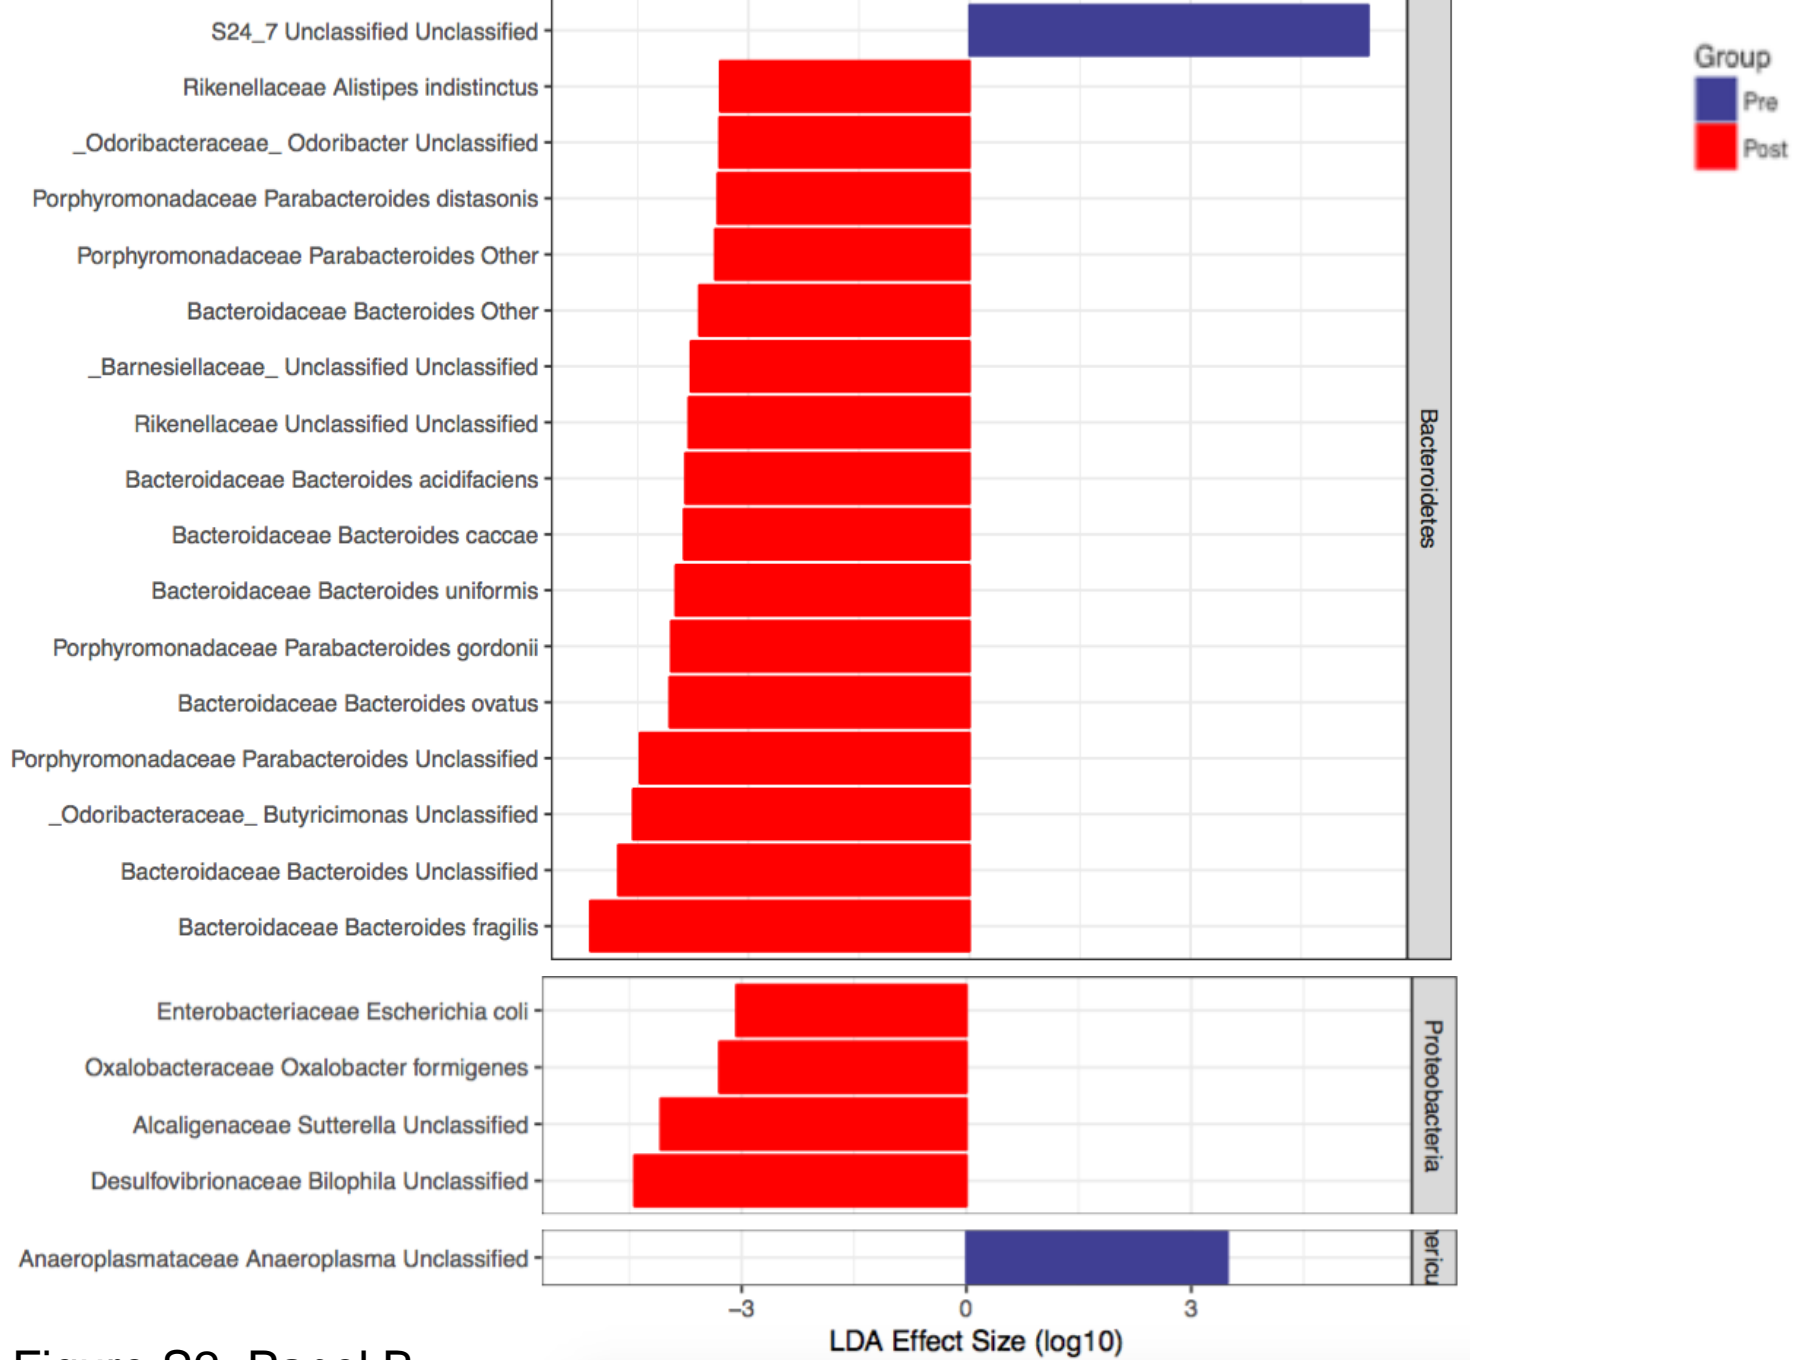

Figure S2, Panel B.

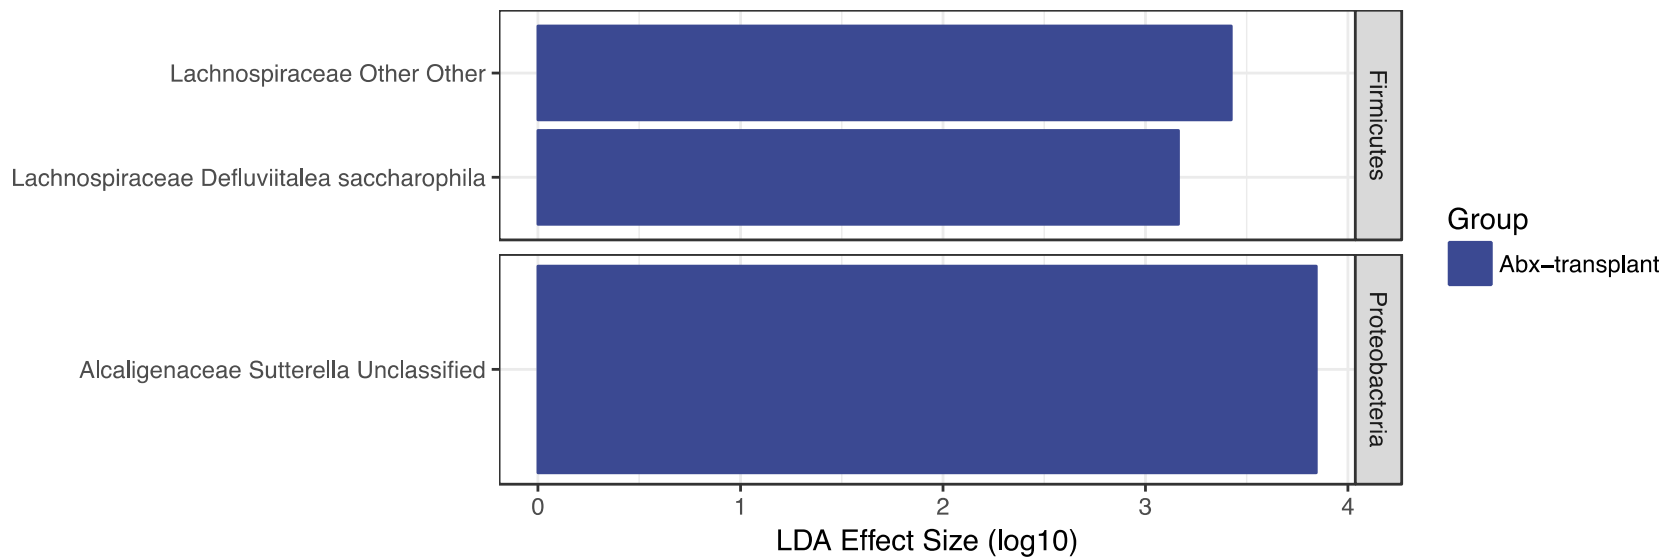

Figure S3.

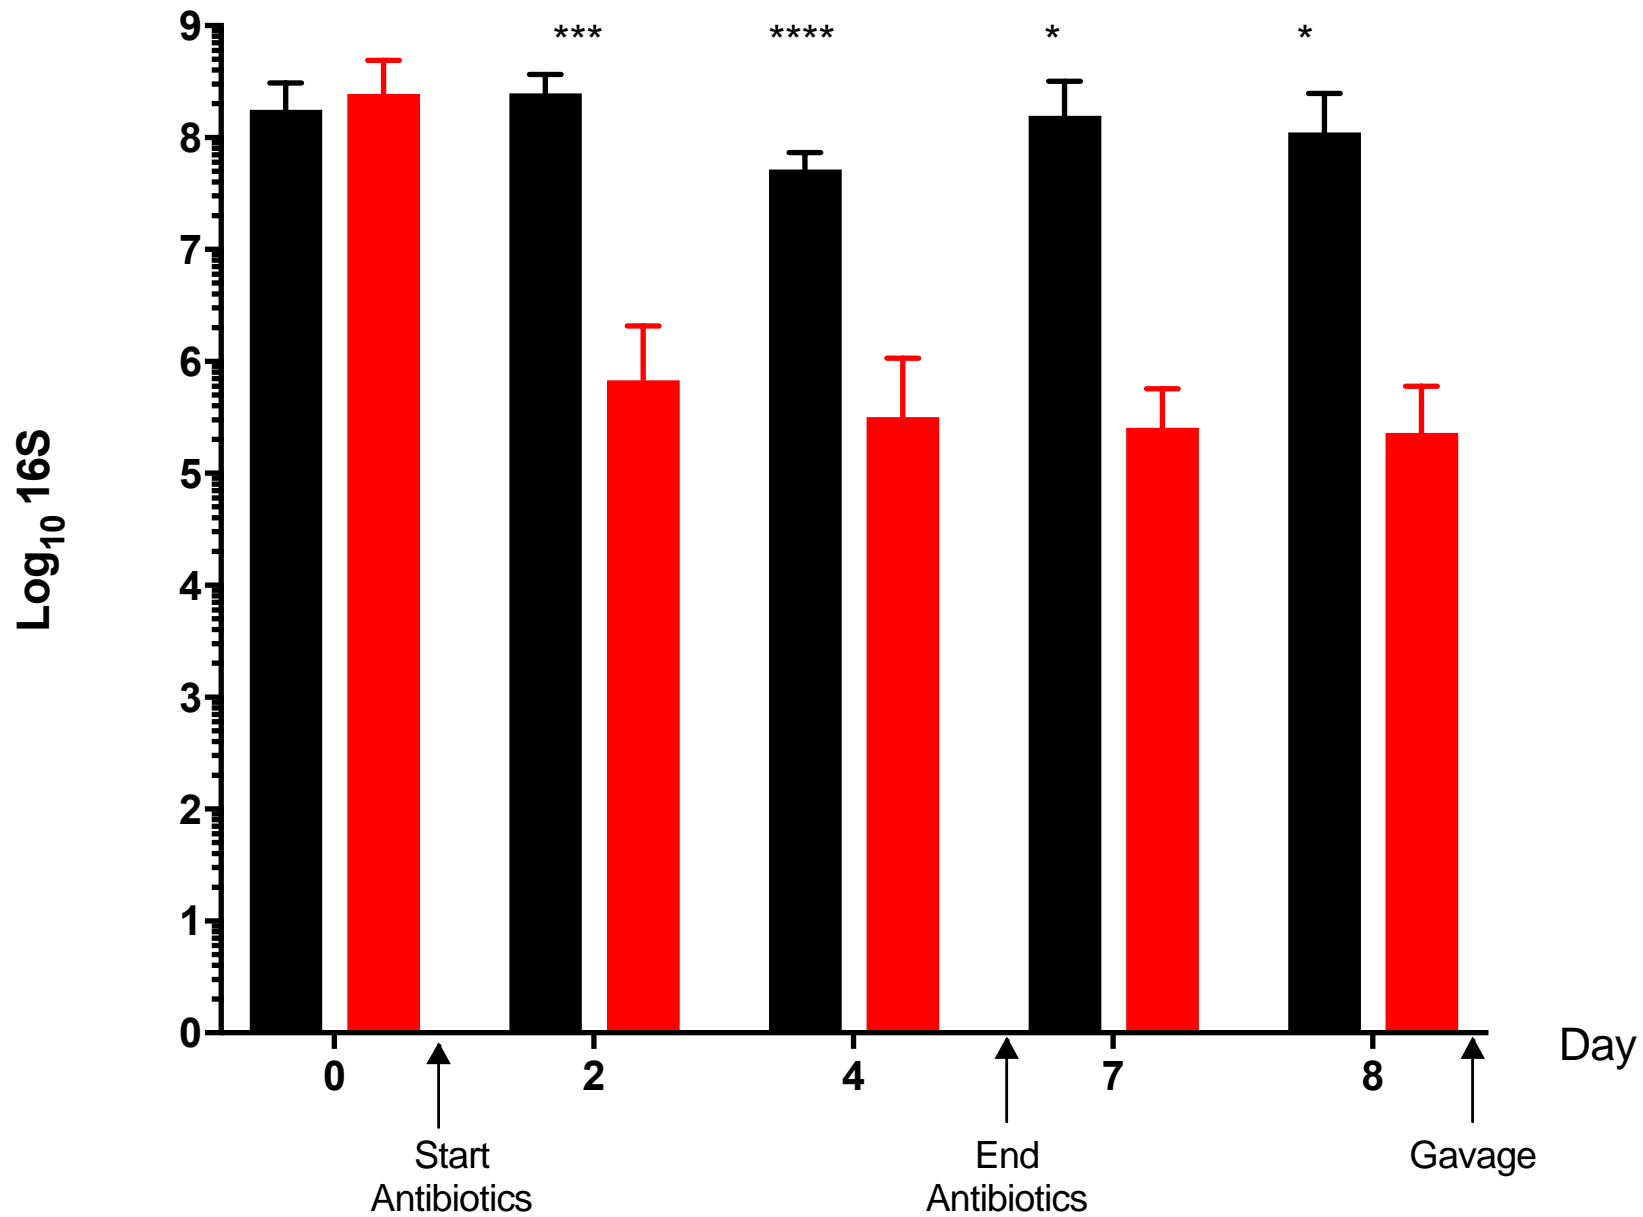

Figure S4.

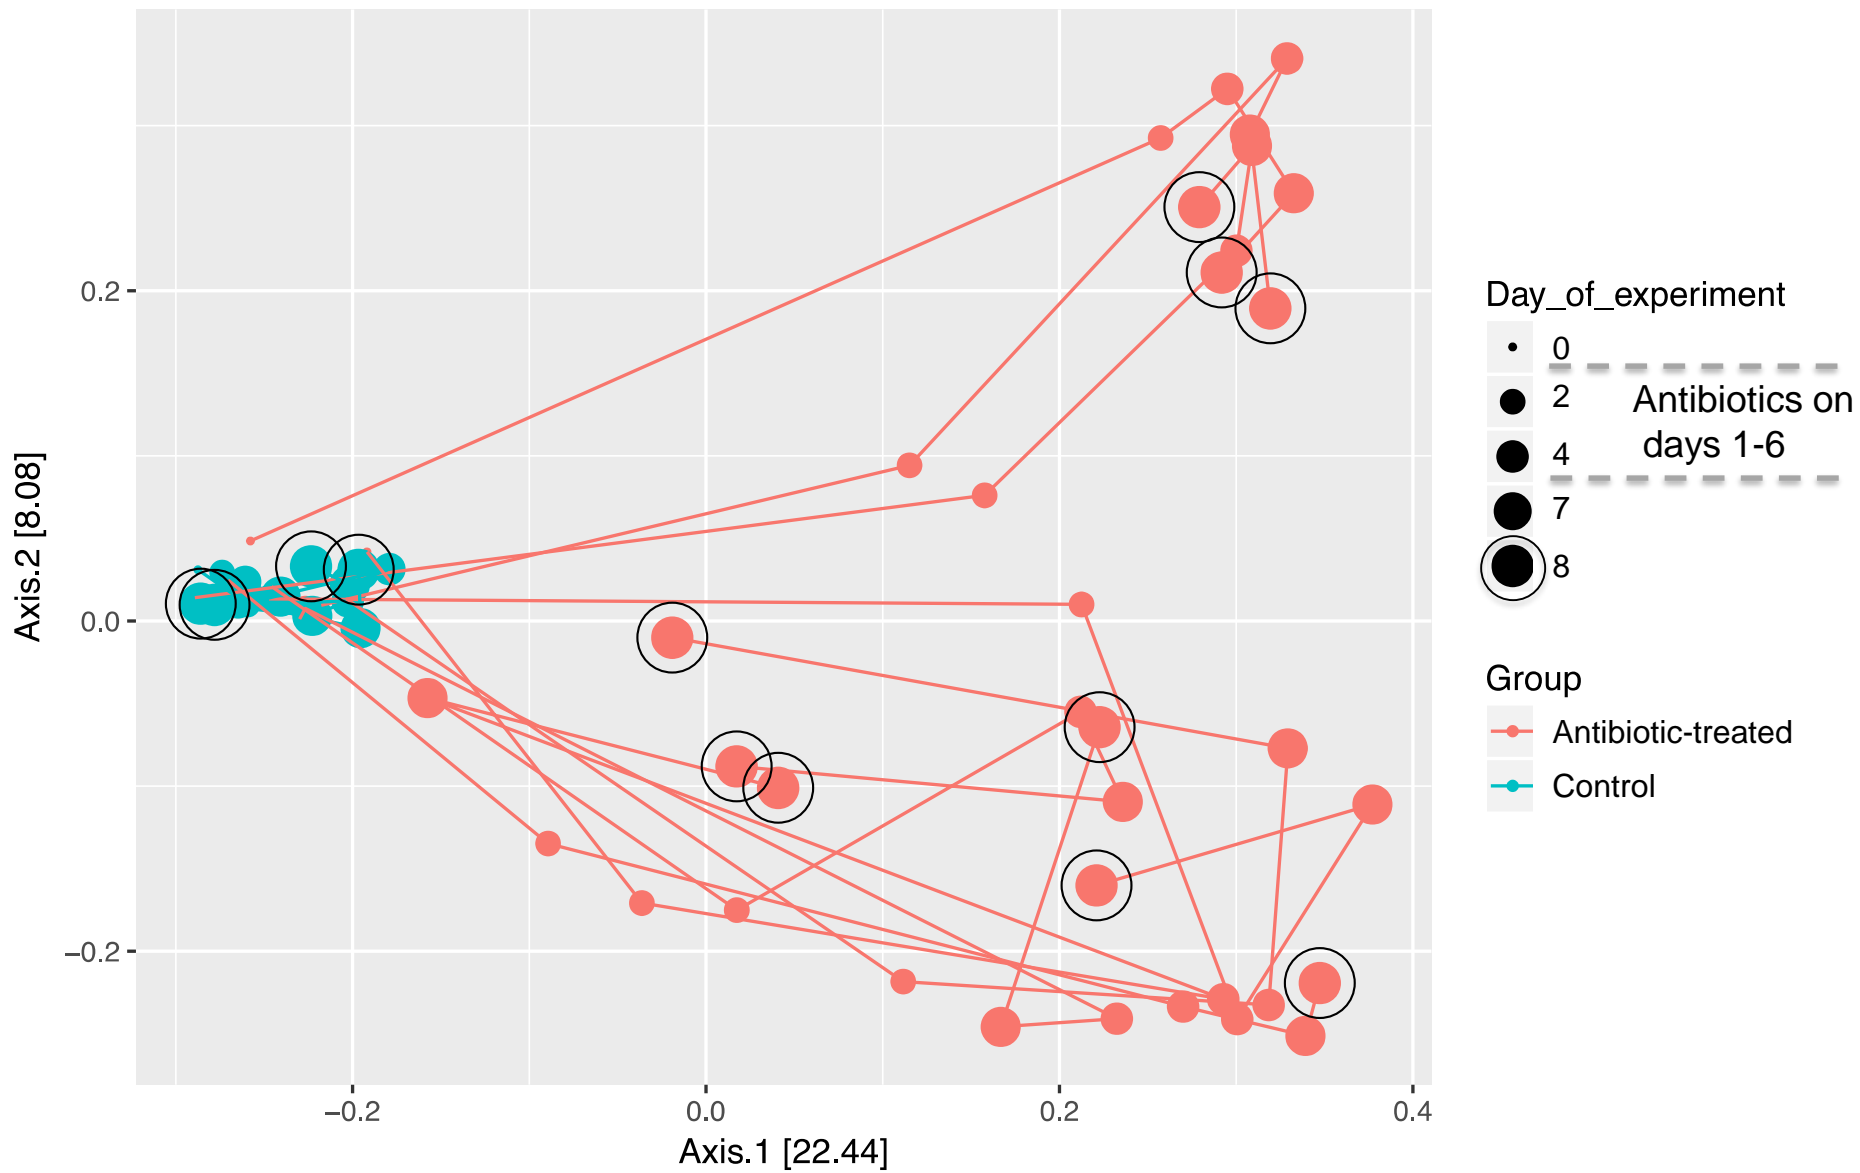

Figure S5.

Supplement: jiz370_suppl_supplementary_figures.pdf [file jiz370_suppl_supplementary_figures.pdf]
